# Supplementary material for: Sleep Study and Oximetry Parameters for Predicting Postoperative Complications in Patients With OSA
Source: PubMed Central journal article supplement — Chest. 2018 Oct 22;155(4):855–67. doi: 10.1016/j.chest.2018.09.030 (PMC6997937; doi:10.1016/j.chest.2018.09.030), 2018-10-22
Supplement: mmc1.pdf [file mmc1.pdf]

## Sleep Study and Oximetry Parameters for Predicting Postoperative Complications in Patients With OSA

*Colin Suen, MD, PhD; Clodagh M. Ryan, MD; Talha Mubashir, MD; Najib T. Ayas, MD; Lusine Abrahamyan, MD, PhD; Jean Wong, MD; Babak Mokhlesi, MD; and Frances Chung, MBBS*

CHEST 2019; 155(4):855-867

*Online supplements are not copyedited prior to posting and the author(s) take full responsibility for the accuracy of all data.*

© 2018 AMERICAN COLLEGE OF CHEST PHYSICIANS. Reproduction of this article is prohibited without written permission from the American College of Chest Physicians. See online for more details. DOI: 10.1016/j.chest.2018.09.030

**e-Table 1 – Systematic search strategy of OSA and perioperative complications**

**2018-01-05 OSA and Sleep Assessment and Postoperative and Adverse Effects - Medline**

| #  | Searches                                                                               | Results |
|----|----------------------------------------------------------------------------------------|---------|
| 1  | exp Sleep Apnea Syndromes/ [ MeSH heading changed from exp sleep disordered breathing] | 34033   |
| 2  | exp obesity hypoventilation syndrome/                                                  | 796     |
| 3  | exp Cheyne Stokes Respiration/                                                         | 775     |
| 4  | apnea/ and sleep/ [historical]                                                         | 281     |
| 5  | apnea/ and (hypoventilation/ or sleep disorders/) [historical]                         | 231     |
| 6  | (apn?ea adj1 attack*).mp,kw.                                                           | 38      |
| 7  | (apn?ea adj1 index*).mp,kw.                                                            | 1001    |
| 8  | (apn?ea adj1 indices*).mp,kw.                                                          | 68      |
| 9  | (apn?ea adj1 monitor*).mp,kw.                                                          | 293     |
| 10 | (central adj2 apnea*).mp,kw.                                                           | 2523    |
| 11 | (central adj2 apnoea*).mp,kw.                                                          | 403     |
| 12 | (cheyne-stokes adj1 breath*).mp,kw.                                                    | 135     |
| 13 | (cheyne-stokes adj1 respirat*).mp,kw.                                                  | 905     |
| 14 | (haddad* adj1 syndrom*).mp,kw.                                                         | 30      |
| 15 | (high* altitud* adj2 (period* adj2 breath*)).mp,kw.                                    | 11      |
| 16 | (hypersomni* adj2 periodic breath*).mp,kw.                                             | 12      |
| 17 | (hypersomni* adj2 periodic respirat*).mp,kw.                                           | 8       |
| 18 | (mixed adj2 apnea*).mp,kw.                                                             | 199     |
| 19 | (mixed adj2 apnoea*).mp,kw.                                                            | 55      |
| 20 | (nocturnal adj2 hypoventilation).mp,kw.                                                | 221     |
| 21 | (nocturnal adj2 hypoxemia).mp,kw.                                                      | 422     |
| 22 | (obes* hypoventil* adj2 apne*?).mp,kw.                                                 | 31      |
| 23 | (obes* hypoventil* adj2 apnoe*?).mp,kw.                                                | 13      |
| 24 | (obstruct* adj2 hypoapnea*).mp,kw.                                                     | 0       |
| 25 | (obstruct* adj2 hypo-apnea*).mp,kw.                                                    | 0       |
| 26 | (obstruct* adj2 hypoapnoea*).mp,kw.                                                    | 0       |
| 27 | (obstruct* adj2 hypo-apnoea*).mp,kw.                                                   | 0       |
| 28 | (obstruct* adj2 hypopnea*).mp,kw.                                                      | 368     |
| 29 | (obstruct* adj2 hypopnoea*).mp,kw.                                                     | 65      |
| 30 | (ondine* adj2 curse*).mp,kw.                                                           | 236     |
| 31 | (ondine* adj2 syndrome*).mp,kw.                                                        | 87      |
| 32 | (pickwick* adj1 syndrom*).mp,kw.                                                       | 346     |
| 33 | (primary adj2 alveolar adj2 hypoventil*).mp,kw.                                        | 70      |
| 34 | (primary adj2 alveolar hypoventil*).mp,kw.                                             | 72      |
| 35 | (sleep adj2 respirat* adj1 disorder*).mp,kw.                                           | 266     |

|    |                                                                             |        |
|----|-----------------------------------------------------------------------------|--------|
| 36 | (sleep disorder* adj1 breathing).mp,kw.                                     | 5549   |
| 37 | (sleep disorder* adj1 respirat*).mp,kw.                                     | 114    |
| 38 | (sleep* adj2 hypopn?ea*).mp,kw.                                             | 2181   |
| 39 | (upper airway resistan* adj2 syndrom*).mp,kw.                               | 243    |
| 40 | apnea-hypopnea*.mp,kw.                                                      | 7382   |
| 41 | apneic*.mp,kw.                                                              | 2520   |
| 42 | apnoea-hypopnoea*.mp,kw.                                                    | 1246   |
| 43 | apnoeic*.mp,kw.                                                             | 775    |
| 44 | cahs.tw. [central alveolar hypoventilation syndrome]                        | 197    |
| 45 | ccah.tw. [congenital central alveolar hypoventilation ]                     | 9      |
| 46 | ccahtw. [congenital central alveolar hypoventilation syndrome]              | 3      |
| 47 | central alveolar hypoventilation syndrome*.mp,kw.                           | 43     |
| 48 | csas.tw. [Central Sleep Apnea Syndrome]                                     | 637    |
| 49 | hypopneic*.mp,kw.                                                           | 73     |
| 50 | hypopnoeic*.mp,kw.                                                          | 13     |
| 51 | obes* hypoventil* syndrome?.mp,kw.                                          | 994    |
| 52 | osa.tw,kw.                                                                  | 10105  |
| 53 | osahs.tw,kw.                                                                | 1206   |
| 54 | osas.tw,kw.                                                                 | 3777   |
| 55 | sleep apne*.mp,kw.                                                          | 37625  |
| 56 | sleep apnoe*.mp,kw.                                                         | 5124   |
| 57 | upper airway* resistan* syndrom*.mp,kw.                                     | 255    |
| 58 | or/1-57 [ ~~ Obstructive Sleep Apnea & Related Terms ~~ ]                   | 45403  |
| 59 | exp sleep/ or dreams/ or sleep deprivation/ or sleep stages/ or sleep, rem/ | 76423  |
| 60 | exp sleep wake disorders/ or dyssomnias/ or exp parasomnias/                | 84352  |
| 61 | sleep*.mp,kw.                                                               | 172470 |
| 62 | slept.mp,kw.                                                                | 2494   |
| 63 | dysomni*.mp,kw.                                                             | 491    |
| 64 | insomni*.mp,kw.                                                             | 16404  |
| 65 | parasomni*.mp,kw.                                                           | 1285   |
| 66 | somnambul*.mp,kw.                                                           | 733    |
| 67 | somnolen*.mp,kw.                                                            | 8476   |
| 68 | sopor.mp,kw.                                                                | 41     |
| 69 | wakeful*.mp,kw.                                                             | 23093  |
| 70 | or/59-69 [ Sleep & related terms ]                                          | 196026 |
| 71 | actigraphy/ or polysomnography/ or symptom assessment/                      | 26303  |
| 72 | exp Sleep/ and exp Monitoring, Physiologic/                                 | 10883  |
| 73 | exp Sleep/ and exp Telemetry/                                               | 226    |
| 74 | exp Sleep/ and Remote Sensing Technology/                                   | 4      |
| 75 | exp sleep wake disorders/ and exp Monitoring, Physiologic/                  | 18594  |

|     |                                                          |         |
|-----|----------------------------------------------------------|---------|
| 76  | exp sleep wake disorders/ and exp Telemetry/             | 93      |
| 77  | exp sleep wake disorders/ and Remote Sensing Technology/ | 9       |
| 78  | Symptom Assessment/                                      | 3155    |
| 79  | Algorithms/                                              | 242987  |
| 80  | Data Collection/                                         | 92830   |
| 81  | Focus Groups/                                            | 25942   |
| 82  | Health Care Surveys/                                     | 31744   |
| 83  | Health Impact Assessment/                                | 492     |
| 84  | Health Status Indicators/                                | 24526   |
| 85  | Health Surveys/                                          | 61628   |
| 86  | Interviews As Topic/                                     | 58171   |
| 87  | Narration/                                               | 7488    |
| 88  | exp Oximetry/                                            | 15184   |
| 89  | Patient Acuity/                                          | 844     |
| 90  | Patient Reported Outcome Measures/                       | 1369    |
| 91  | Predictive Value of Tests/                               | 198714  |
| 92  | "Quality of Life"/                                       | 178433  |
| 93  | "Severity Of Illness Index"/                             | 237434  |
| 94  | Sickness Impact Profile/                                 | 8075    |
| 95  | "Surveys and Questionnaires"/                            | 429683  |
| 96  | algorithm*.mp,kw.                                        | 310484  |
| 97  | assess*.mp,kw.                                           | 2678047 |
| 98  | audit?.mp,kw.                                            | 44063   |
| 99  | checklist?.mp,kw.                                        | 29231   |
| 100 | check-list?.mp,kw.                                       | 2710    |
| 101 | evaluat*.mp,kw.                                          | 3196932 |
| 102 | focus_group*.mp,kw.                                      | 37123   |
| 103 | (health_adj2_determinant*).mp.                           | 6738    |
| 104 | HRQoL.mp,kw.                                             | 12319   |
| 105 | index*.mp,kw.                                            | 916798  |
| 106 | indices.mp,kw.                                           | 142112  |
| 107 | indicator?.mp.                                           | 311539  |
| 108 | interview*.mp,kw.                                        | 316993  |
| 109 | instrument?.mp,kw.                                       | 177882  |
| 110 | inventories.mp,kw.                                       | 5337    |
| 111 | inventory.mp,kw.                                         | 84340   |
| 112 | measur*.mp,kw.                                           | 2996540 |
| 113 | metric?.mp,kw.                                           | 35691   |
| 114 | monitor*3.mp,kw.                                         | 812073  |
| 115 | MOS-sleep.mp,kw.                                         | 92      |
| 116 | narrati*.mp,kw.                                          | 31568   |

|     |                                                                         |         |
|-----|-------------------------------------------------------------------------|---------|
| 117 | oximetr*.mp.                                                            | 16714   |
| 118 | oximeter*.mp.                                                           | 3670    |
| 119 | patient analys#s.mp,kw.                                                 | 714     |
| 120 | poll?.mp,kw.                                                            | 2789    |
| 121 | polysomnogra*.mp,kw.                                                    | 25038   |
| 122 | PSQI.mp,kw.                                                             | 1740    |
| 123 | QoL.mp,kw.                                                              | 29343   |
| 124 | questionnaire?.mp,kw.                                                   | 613932  |
| 125 | rating?.mp,kw.                                                          | 191320  |
| 126 | (scale or scales).mp,kw.                                                | 633133  |
| 127 | screening?.mp,kw.                                                       | 492140  |
| 128 | (score or scores or scored or scoring?).mp,kw.                          | 748577  |
| 129 | (sleep* adj2 quality).mp,kw.                                            | 10943   |
| 130 | (sleep* adj2 (study or studies)).mp,kw.                                 | 5804    |
| 131 | (sleep* adj2 (test or tests or tested or testing)).mp,kw.               | 2179    |
| 132 | somnogra*.mp,kw.                                                        | 78      |
| 133 | status exam*.mp,kw.                                                     | 1690    |
| 134 | survey*.mp,kw.                                                          | 863193  |
| 135 | (tool? or toolkit? or tool-kit?).mp,kw.                                 | 524967  |
| 136 | videopolysomnogra*.mp,kw.                                               | 45      |
| 137 | "SPO2".mp. [ TESTING ]                                                  | 3430    |
| 138 | "SP-O2".mp. [ TESTING ]                                                 | 74      |
| 139 | ODI.mp. [ O2 Desaturation Index - TESTING ]                             | 2767    |
| 140 | ((oxygen* or O2) adj1 desatur* adj1 (index?? or indices)).mp. [TESTING] | 751     |
| 141 | (apn?ea adj2 duration*).mp. [ TESTING ]                                 | 559     |
| 142 | ("CT90" or "CT 90").mp. [ TESTING ]                                     | 107     |
| 143 | (oxygen* adj2 saturat*).mp. [ TESTING ]                                 | 23764   |
| 144 | or/71-143 [ Assessment or Measurement & related terms ]                 | 9174954 |
| 145 | 70 and 144 [ Sleep + Assessment ]                                       | 117522  |
| 146 | 58 and 145 [ OSA + Sleep + Assessment ]                                 | 29700   |
| 147 | exp Pain, Postoperative/                                                | 38874   |
| 148 | exp Postoperative Care/                                                 | 60858   |
| 149 | exp Postoperative Period/                                               | 53012   |
| 150 | exp Postoperative Complications/                                        | 537658  |
| 151 | (postop* or post-op*).mp,kw.                                            | 805116  |
| 152 | (postamput* or post-amput*).mp,kw.                                      | 491     |
| 153 | (postincision* or post-incision*).mp,kw.                                | 275     |
| 154 | (postprocedur* or post-procedur*).mp,kw.                                | 10191   |
| 155 | (postsurg* or post-surg*).mp,kw.                                        | 28417   |
| 156 | (postresect* or post-resect*).mp,kw.                                    | 1563    |

|     |                                                                                                         |         |
|-----|---------------------------------------------------------------------------------------------------------|---------|
| 157 | (postintervention* or post-intervention*).mp,kw.                                                        | 15465   |
| 158 | (postlapar* or post-lapar*).mp,kw.                                                                      | 431     |
| 159 | (postmastectom* or post-mastectom*).mp,kw.                                                              | 2352    |
| 160 | (follow* adj2 surg*).mp,kw.                                                                             | 57646   |
| 161 | (follow* adj2 intervention*).mp,kw.                                                                     | 9993    |
| 162 | (follow* adj2 procedur*).mp,kw.                                                                         | 14848   |
| 163 | (follow* adj2 resect*).mp,kw.                                                                           | 12929   |
| 164 | (after adj3 incision?).mp,kw.                                                                           | 3526    |
| 165 | (after adj3 laparo*).mp,kw.                                                                             | 16395   |
| 166 | (after adj3 operati*).mp,kw.                                                                            | 81201   |
| 167 | (after adj3 procedur*).mp.                                                                              | 46313   |
| 168 | (after adj3 resect*).mp,kw.                                                                             | 47047   |
| 169 | (after adj3 surger*).mp,kw.                                                                             | 209660  |
| 170 | (after adj3 surgical*).mp,kw.                                                                           | 45676   |
| 171 | or/147-170 [ Postoperative & related terms ]                                                            | 1216237 |
| 172 | 146 and 171 [ (OSA + (Sleep + Assessment)) + Postoperative ]                                            | 3440    |
| 173 | Complication?.mp,kw.                                                                                    | 1256424 |
| 174 | ae.fs. [Adverse Effects floating subheading]                                                            | 1723054 |
| 175 | ci.fs. [Chemically induced floating subheading]                                                         | 596263  |
| 176 | co.fs. [Complications floating subheading]                                                              | 1989465 |
| 177 | ct.fs. [Contraindications floating subheading]                                                          | 23460   |
| 178 | de.fs. [Drug Effects floating subheading]                                                               | 2991609 |
| 179 | pc.fs. [Prevention & Control floating subheading]                                                       | 1277895 |
| 180 | po.fs. [Poisoning floating subheading]                                                                  | 69041   |
| 181 | to.fs. [Toxicity floating subheading]                                                                   | 417770  |
| 182 | Dose-Response Relationship, Drug/                                                                       | 413892  |
| 183 | exp "Drug-Related Side Effects And Adverse Reactions"/ [Nb: Drug Toxicity Was Changed To This Jan 2014] | 112464  |
| 184 | exp Abnormalities, Drug Induced/                                                                        | 15287   |
| 185 | exp Adverse Drug Reaction Reporting Systems/                                                            | 7632    |
| 186 | exp Clinical Trial, Phase Iv/                                                                           | 1731    |
| 187 | exp Drug Eruptions/                                                                                     | 23176   |
| 188 | exp Drug Hypersensitivity/                                                                              | 45683   |
| 189 | exp Drug Monitoring/                                                                                    | 20140   |
| 190 | exp Poisoning/                                                                                          | 158657  |
| 191 | exp Product Surveillance, Postmarketing/                                                                | 15087   |
| 192 | exp Substance-Related Disorders/                                                                        | 273643  |
| 193 | exp Toxic Actions/                                                                                      | 1227783 |
| 194 | Failure To Rescue, Health Care/ [New MeSH 2016]                                                         | 58      |
| 195 | Herb-Drug Interactions/                                                                                 | 1513    |
| 196 | Iatrogenic Disease/                                                                                     | 16466   |

|     |                                                                                                                                                                                                                                   |         |
|-----|-----------------------------------------------------------------------------------------------------------------------------------------------------------------------------------------------------------------------------------|---------|
| 197 | Malpractice/                                                                                                                                                                                                                      | 28098   |
| 198 | Medical Errors/                                                                                                                                                                                                                   | 16171   |
| 199 | Medication Errors/                                                                                                                                                                                                                | 12952   |
| 200 | Morbidity/                                                                                                                                                                                                                        | 29462   |
| 201 | Mortality/                                                                                                                                                                                                                        | 42347   |
| 202 | Patient Harm/ [New MeSH 2014]                                                                                                                                                                                                     | 108     |
| 203 | ((allergic or idiosyncratic*) adj2 react*).mp,kw.                                                                                                                                                                                 | 18570   |
| 204 | ((allergic or idiosyncratic*) adj2 respons*).mp,kw.                                                                                                                                                                               | 5978    |
| 205 | ((drug? or medication?) adj2 (hypersensitiv* or hypersensitiv*).mp,kw.                                                                                                                                                            | 24906   |
| 206 | ((incorrect* or incomplete) adj2 knowledge).mp,kw.                                                                                                                                                                                | 855     |
| 207 | ((phase iv or phase four) adj2 trial?).mp,kw.                                                                                                                                                                                     | 2170    |
| 208 | ((undesirable or harm* or serious* or toxic) adj3 (effect* or reaction* or event* or outcome*).mp,kw.                                                                                                                             | 110761  |
| 209 | (adverse* adj2 affect*).mp,kw.                                                                                                                                                                                                    | 29575   |
| 210 | (adverse* adj2 drug*).mp,kw.                                                                                                                                                                                                      | 26076   |
| 211 | (adverse* adj2 effect*).mp,kw.                                                                                                                                                                                                    | 180075  |
| 212 | (adverse* adj2 event*).mp,kw.                                                                                                                                                                                                     | 135972  |
| 213 | (adverse* adj2 outcome*).mp,kw.                                                                                                                                                                                                   | 39370   |
| 214 | (adverse* adj2 react*).mp,kw.                                                                                                                                                                                                     | 70940   |
| 215 | (inaccura* adj2 (information or record*).mp,kw.                                                                                                                                                                                   | 520     |
| 216 | (incomplete adj2 (information or record*).mp,kw.                                                                                                                                                                                  | 1759    |
| 217 | (near adj2 miss*).mp,kw.                                                                                                                                                                                                          | 1845    |
| 218 | (omission? adj2 (dose? or drug? or medication?)).mp,kw.                                                                                                                                                                           | 280     |
| 219 | (omit* adj2 (dose? or drug? or medication?)).mp,kw.                                                                                                                                                                               | 218     |
| 220 | (patient? adj1 report* adj1 incident?).mp,kw.                                                                                                                                                                                     | 25      |
| 221 | (prevent* adj2 accident*).mp,kw.                                                                                                                                                                                                  | 11335   |
| 222 | (prevent* adj2 inciden*).mp,kw.                                                                                                                                                                                                   | 1719    |
| 223 | (safe or safety or side effect* or undesirable effect* or treatment emergent or tolerability or toxicity or adrs or (adverse adj2 (effect or effects or reaction or reactions or event or events or outcome or outcomes))).ti,ab. | 1289051 |
| 224 | (undesir* adj2 event?).mp,kw.                                                                                                                                                                                                     | 448     |
| 225 | adr.mp,kw. [adverse drug reaction]                                                                                                                                                                                                | 7336    |
| 226 | adrs.mp,kw. [adverse drug reactions]                                                                                                                                                                                              | 3018    |
| 227 | adverse drug?.mp,kw.                                                                                                                                                                                                              | 21564   |
| 228 | contraindicat*.mp,kw.                                                                                                                                                                                                             | 41592   |
| 229 | dae.mp,kw. [drug related adverse event]                                                                                                                                                                                           | 371     |
| 230 | daes.mp,kw. [drug related adverse events]                                                                                                                                                                                         | 43      |
| 231 | dose-response relation*.mp,kw.                                                                                                                                                                                                    | 473585  |
| 232 | drug erupt*.mp,kw.                                                                                                                                                                                                                | 13858   |
| 233 | drug induced.mp,kw.                                                                                                                                                                                                               | 83723   |

|     |                                                                                                                                                                                                                                                                                      |          |
|-----|--------------------------------------------------------------------------------------------------------------------------------------------------------------------------------------------------------------------------------------------------------------------------------------|----------|
| 234 | drug toxic*.mp,kw.                                                                                                                                                                                                                                                                   | 5250     |
| 235 | drug-related.mp,kw.                                                                                                                                                                                                                                                                  | 43105    |
| 236 | error?.mp,kw.                                                                                                                                                                                                                                                                        | 301660   |
| 237 | harm*5.mp,kw.                                                                                                                                                                                                                                                                        | 116355   |
| 238 | iatrogenic*.mp,kw.                                                                                                                                                                                                                                                                   | 34667    |
| 239 | intolerab*.mp,kw.                                                                                                                                                                                                                                                                    | 3528     |
| 240 | malfunction*.mp,kw.                                                                                                                                                                                                                                                                  | 12845    |
| 241 | mistak*.mp,kw.                                                                                                                                                                                                                                                                       | 18373    |
| 242 | noxious.mp,kw.                                                                                                                                                                                                                                                                       | 14657    |
| 243 | pharmacovigilan*.mp,kw.                                                                                                                                                                                                                                                              | 4066     |
| 244 | pharmaco-vigilan*.mp,kw.                                                                                                                                                                                                                                                             | 53       |
| 245 | poison*.mp,kw.                                                                                                                                                                                                                                                                       | 119292   |
| 246 | sequelae.mp,kw.                                                                                                                                                                                                                                                                      | 56272    |
| 247 | side effect*.mp,kw.                                                                                                                                                                                                                                                                  | 247312   |
| 248 | tolerability.mp,kw.                                                                                                                                                                                                                                                                  | 43096    |
| 249 | unanticipat*.mp,kw.                                                                                                                                                                                                                                                                  | 5627     |
| 250 | undesired.mp,kw.                                                                                                                                                                                                                                                                     | 5773     |
| 251 | unintended.mp,kw.                                                                                                                                                                                                                                                                    | 9630     |
| 252 | risk*3.mp.                                                                                                                                                                                                                                                                           | 2188335  |
| 253 | or/173-252 [~~ Adverse Effects / Adverse Drug Events -- BROADER<br>~~]                                                                                                                                                                                                               | 10450949 |
| 254 | 172 and 253 [ (OSA + (Sleep + Assessment)) + Postoperative +<br>Adverse Effects ]                                                                                                                                                                                                    | 2536     |
| 255 | limit 254 to english language                                                                                                                                                                                                                                                        | 2278     |
| 256 | exp animals/ not (exp animals/ and humans/)                                                                                                                                                                                                                                          | 4810582  |
| 257 | 255 not 256                                                                                                                                                                                                                                                                          | 2264     |
| 258 | limit 255 to human                                                                                                                                                                                                                                                                   | 2263     |
| 259 | 257 or 258                                                                                                                                                                                                                                                                           | 2264     |
| 260 | limit 259 to ("all infant (birth to 23 months)" or "all child (0 to 18<br>years)" or "newborn infant (birth to 1 month)" or "infant (1 to 23<br>months)" or "preschool child (2 to 5 years)" or "child (6 to 12 years)" or<br>"adolescent (13 to 18 years)")                         | 863      |
| 261 | 259 not 260                                                                                                                                                                                                                                                                          | 1401     |
| 262 | limit 259 to ("all adult (19 plus years)" or "young adult (19 to 24<br>years)" or "adult (19 to 44 years)" or "young adult and adult (19-24<br>and 19-44)" or "middle age (45 to 64 years)" or "middle aged (45 plus<br>years)" or "all aged (65 and over)" or "aged (80 and over)") | 1340     |
| 263 | 261 or 262                                                                                                                                                                                                                                                                           | 1628     |
| 264 | remove duplicates from 263                                                                                                                                                                                                                                                           | 1366     |
| 265 | sleep apnea.mp. or exp Sleep Apnea Syndromes/ [CS Search Strategy]                                                                                                                                                                                                                   | 38151    |
| 266 | postoperative complications.mp. or exp Postoperative Complications/                                                                                                                                                                                                                  | 558458   |
| 267 | exp Polysomnography/                                                                                                                                                                                                                                                                 | 20430    |



|     |                                                                      |        |
|-----|----------------------------------------------------------------------|--------|
| 268 | exp Oximetry/                                                        | 15184  |
| 269 | 267 or 268                                                           | 35006  |
| 270 | 265 and 266 and 269                                                  | 321    |
| 271 | apnea-hypopnea index.mp.                                             | 5939   |
| 272 | oxygen desaturation index.mp.                                        | 708    |
| 273 | respiratory disturbance index.mp.                                    | 1025   |
| 274 | postoperative adverse events.mp.                                     | 448    |
| 275 | 267 or 268 or 271 or 272 or 273                                      | 37391  |
| 276 | 266 or 274                                                           | 558624 |
| 277 | 265 and 275 and 276 [ End of CS Search Strategy ]                    | 396    |
| 278 | 264 not 277 [ Removal of citations from CS search already reviewed ] | 1154   |
| 279 | limit 278 to yr="2008 -Current"                                      | 720    |

**e-Table 2**  
**Medline In-Process / ePubs ahead of Print**

**Ovid MEDLINE(R) Epub Ahead of Print and In-Process & Other Non-Indexed Citations January 05, 2018**

| #  | Searches                                                                               | Results |
|----|----------------------------------------------------------------------------------------|---------|
| 1  | exp Sleep Apnea Syndromes/ [ MeSH heading changed from exp sleep disordered breathing] | 4       |
| 2  | exp obesity hypoventilation syndrome/                                                  | 0       |
| 3  | exp Cheyne Stokes Respiration/                                                         | 0       |
| 4  | apnea/ and sleep/ [historical]                                                         | 0       |
| 5  | apnea/ and (hypoventilation/ or sleep disorders/) [historical]                         | 0       |
| 6  | (apn?ea adj1 attack*).mp,kw.                                                           | 3       |
| 7  | (apn?ea adj1 index*).mp,kw.                                                            | 62      |
| 8  | (apn?ea adj1 indices*).mp,kw.                                                          | 7       |
| 9  | (apn?ea adj1 monitor*).mp,kw.                                                          | 13      |
| 10 | (central adj2 apnea*).mp,kw.                                                           | 193     |
| 11 | (central adj2 apnoea*).mp,kw.                                                          | 42      |
| 12 | (cheyne-stokes adj1 breath*).mp,kw.                                                    | 15      |
| 13 | (cheyne-stokes adj1 respirat*).mp,kw.                                                  | 59      |
| 14 | (haddad* adj1 syndrom*).mp,kw.                                                         | 2       |
| 15 | (high* altitud* adj2 (period* adj2 breath*)).mp,kw.                                    | 1       |
| 16 | (hypersomni* adj2 periodic breath*).mp,kw.                                             | 0       |
| 17 | (hypersomni* adj2 periodic respirat*).mp,kw.                                           | 0       |
| 18 | (mixed adj2 apnea*).mp,kw.                                                             | 12      |
| 19 | (mixed adj2 apnoea*).mp,kw.                                                            | 1       |
| 20 | (nocturnal adj2 hypoventilation).mp,kw.                                                | 20      |
| 21 | (nocturnal adj2 hypoxemia).mp,kw.                                                      | 35      |
| 22 | (obes* hypoventil* adj2 apne*?).mp,kw.                                                 | 12      |
| 23 | (obes* hypoventil* adj2 apnoe*?).mp,kw.                                                | 2       |
| 24 | (obstruct* adj2 hypoapnea*).mp,kw.                                                     | 0       |
| 25 | (obstruct* adj2 hypo-apnea*).mp,kw.                                                    | 0       |
| 26 | (obstruct* adj2 hypoapnoea*).mp,kw.                                                    | 0       |
| 27 | (obstruct* adj2 hypo-apnoea*).mp,kw.                                                   | 0       |
| 28 | (obstruct* adj2 hypopnea*).mp,kw.                                                      | 57      |
| 29 | (obstruct* adj2 hypopnoea*).mp,kw.                                                     | 6       |
| 30 | (ondine* adj2 curse*).mp,kw.                                                           | 9       |
| 31 | (ondine* adj2 syndrome*).mp,kw.                                                        | 3       |
| 32 | (pickwick* adj1 syndrom*).mp,kw.                                                       | 10      |
| 33 | (primary adj2 alveolar adj2 hypoventil*).mp,kw.                                        | 0       |
| 34 | (primary adj2 alveolar hypoventil*).mp,kw.                                             | 0       |

|    |                                                                             |       |
|----|-----------------------------------------------------------------------------|-------|
| 35 | (sleep adj2 respirat* adj1 disorder*).mp,kw.                                | 26    |
| 36 | (sleep disorder* adj1 breathing).mp,kw.                                     | 772   |
| 37 | (sleep disorder* adj1 respirat*).mp,kw.                                     | 20    |
| 38 | (sleep* adj2 hypopn?ea*).mp,kw.                                             | 194   |
| 39 | (upper airway resistan* adj2 syndrom*).mp,kw.                               | 26    |
| 40 | apnea-hypopnea*.mp,kw.                                                      | 893   |
| 41 | apneic*.mp,kw.                                                              | 150   |
| 42 | apnoea-hypopnoea*.mp,kw.                                                    | 126   |
| 43 | apnoeic*.mp,kw.                                                             | 55    |
| 44 | cahs.tw. [central alveolar hypoventilation syndrome]                        | 10    |
| 45 | ccah.tw. [congenital central alveolar hypoventilation ]                     | 0     |
| 46 | ccahs.tw. [congenital central alveolar hypoventilation syndrome]            | 2     |
| 47 | central alveolar hypoventilation syndrome*.mp,kw.                           | 2     |
| 48 | csas.tw. [Central Sleep Apnea Syndrome]                                     | 108   |
| 49 | hypopneic*.mp,kw.                                                           | 5     |
| 50 | hypopnoeic*.mp,kw.                                                          | 2     |
| 51 | obes* hypoventil* syndrome?.mp,kw.                                          | 79    |
| 52 | osa.tw,kw.                                                                  | 1863  |
| 53 | osahs.tw,kw.                                                                | 110   |
| 54 | osas.tw,kw.                                                                 | 416   |
| 55 | sleep apne*.mp,kw.                                                          | 3412  |
| 56 | sleep apnoe*.mp,kw.                                                         | 677   |
| 57 | upper airway* resistan* syndrom*.mp,kw.                                     | 27    |
| 58 | or/1-57 [ ~~ Obstructive Sleep Apnea & Related Terms ~~ ]                   | 5120  |
| 59 | exp sleep/ or dreams/ or sleep deprivation/ or sleep stages/ or sleep, rem/ | 22    |
| 60 | exp sleep wake disorders/ or dyssomnias/ or exp parasomnias/                | 25    |
| 61 | sleep*.mp,kw.                                                               | 18389 |
| 62 | slept.mp,kw.                                                                | 295   |
| 63 | dyssomni*.mp,kw.                                                            | 14    |
| 64 | insomni*.mp,kw.                                                             | 2612  |
| 65 | parasomni*.mp,kw.                                                           | 175   |
| 66 | somnambul*.mp,kw.                                                           | 34    |
| 67 | somnolen*.mp,kw.                                                            | 573   |
| 68 | sopor.mp,kw.                                                                | 4     |
| 69 | wakeful*.mp,kw.                                                             | 924   |
| 70 | or/59-69 [ Sleep & related terms ]                                          | 20183 |
| 71 | actigraphy/ or polysomnography/ or symptom assessment/                      | 0     |
| 72 | exp Sleep/ and exp Monitoring, Physiologic/                                 | 0     |
| 73 | exp Sleep/ and exp Telemetry/                                               | 0     |
| 74 | exp Sleep/ and Remote Sensing Technology/                                   | 0     |

|     |                                                            |        |
|-----|------------------------------------------------------------|--------|
| 75  | exp sleep wake disorders/ and exp Monitoring, Physiologic/ | 0      |
| 76  | exp sleep wake disorders/ and exp Telemetry/               | 0      |
| 77  | exp sleep wake disorders/ and Remote Sensing Technology/   | 0      |
| 78  | Symptom Assessment/                                        | 0      |
| 79  | Algorithms/                                                | 6      |
| 80  | Data Collection/                                           | 5      |
| 81  | Focus Groups/                                              | 0      |
| 82  | Health Care Surveys/                                       | 0      |
| 83  | Health Impact Assessment/                                  | 0      |
| 84  | Health Status Indicators/                                  | 1      |
| 85  | Health Surveys/                                            | 0      |
| 86  | Interviews As Topic/                                       | 0      |
| 87  | Narration/                                                 | 0      |
| 88  | exp Oximetry/                                              | 0      |
| 89  | Patient Acuity/                                            | 0      |
| 90  | Patient Reported Outcome Measures/                         | 0      |
| 91  | Predictive Value of Tests/                                 | 0      |
| 92  | "Quality of Life"/                                         | 11     |
| 93  | "Severity Of Illness Index"/                               | 1      |
| 94  | Sickness Impact Profile/                                   | 4      |
| 95  | "Surveys and Questionnaires"/                              | 9      |
| 96  | algorithm*.mp,kw.                                          | 49998  |
| 97  | assess*.mp,kw.                                             | 317246 |
| 98  | audit?.mp,kw.                                              | 4233   |
| 99  | checklist?.mp,kw.                                          | 5129   |
| 100 | check-list?.mp,kw.                                         | 347    |
| 101 | evaluat*.mp,kw.                                            | 376743 |
| 102 | focus group*.mp,kw.                                        | 6519   |
| 103 | (health adj2 determinant*).mp.                             | 1465   |
| 104 | HRQoL.mp,kw.                                               | 2039   |
| 105 | index*.mp,kw.                                              | 100099 |
| 106 | indices.mp,kw.                                             | 16067  |
| 107 | indicator?.mp.                                             | 29156  |
| 108 | interview*.mp,kw.                                          | 38452  |
| 109 | instrument?.mp,kw.                                         | 26256  |
| 110 | inventories.mp,kw.                                         | 749    |
| 111 | inventory.mp,kw.                                           | 9649   |
| 112 | measur*.mp,kw.                                             | 428112 |
| 113 | metric?.mp,kw.                                             | 10841  |
| 114 | monitor*3.mp,kw.                                           | 88762  |
| 115 | MOS-sleep.mp,kw.                                           | 14     |

|     |                                                                           |         |
|-----|---------------------------------------------------------------------------|---------|
| 116 | narrati*.mp,kw.                                                           | 6729    |
| 117 | oximetr*.mp.                                                              | 941     |
| 118 | oximeter*.mp.                                                             | 347     |
| 119 | patient analys#s.mp,kw.                                                   | 69      |
| 120 | poll?.mp,kw.                                                              | 292     |
| 121 | polysomnogra*.mp,kw.                                                      | 1794    |
| 122 | PSQI.mp,kw.                                                               | 531     |
| 123 | QoL.mp,kw.                                                                | 5045    |
| 124 | questionnaire?.mp,kw.                                                     | 59021   |
| 125 | rating?.mp,kw.                                                            | 17352   |
| 126 | (scale or scales).mp,kw.                                                  | 131715  |
| 127 | screening?.mp,kw.                                                         | 56603   |
| 128 | (score or scores or scored or scoring?).mp,kw.                            | 111730  |
| 129 | (sleep* adj2 quality).mp,kw.                                              | 2434    |
| 130 | (sleep* adj2 (study or studies)).mp,kw.                                   | 727     |
| 131 | (sleep* adj2 (test or tests or tested or testing)).mp,kw.                 | 264     |
| 132 | somnogra*.mp,kw.                                                          | 4       |
| 133 | status exam*.mp,kw.                                                       | 266     |
| 134 | survey*.mp,kw.                                                            | 70051   |
| 135 | (tool? or toolkit? or tool-kit?).mp,kw.                                   | 97721   |
| 136 | videopolysomnogra*.mp,kw.                                                 | 6       |
| 137 | "SPO2".mp. [ TESTING ]                                                    | 672     |
| 138 | "SP-O2".mp. [ TESTING ]                                                   | 1       |
| 139 | ODI.mp. [ O2 Desaturation Index - TESTING ]                               | 927     |
| 140 | ((oxygen* or O2) adj1 desatur* adj1 (index?? or indices)).mp. [ TESTING ] | 137     |
| 141 | (apn?ea adj2 duration*).mp. [ TESTING ]                                   | 43      |
| 142 | ("CT90" or "CT 90").mp. [ TESTING ]                                       | 12      |
| 143 | (oxygen* adj2 saturat*).mp. [ TESTING ]                                   | 2611    |
| 144 | or/71-143 [ Assessment or Measurement & related terms ]                   | 1201864 |
| 145 | 70 and 144 [ Sleep + Assessment ]                                         | 13767   |
| 146 | 58 and 145 [ OSA + Sleep + Assessment ]                                   | 3163    |
| 147 | exp Pain, Postoperative/                                                  | 0       |
| 148 | exp Postoperative Care/                                                   | 1       |
| 149 | exp Postoperative Period/                                                 | 1       |
| 150 | exp Postoperative Complications/                                          | 13      |
| 151 | (postop* or post-op*).mp,kw.                                              | 58218   |
| 152 | (postamput* or post-amput*).mp,kw.                                        | 78      |
| 153 | (postincision* or post-incision*).mp,kw.                                  | 37      |
| 154 | (postprocedur* or post-procedur*).mp,kw.                                  | 1784    |
| 155 | (postsurg* or post-surg*).mp,kw.                                          | 4510    |

|     |                                                                                                         |        |
|-----|---------------------------------------------------------------------------------------------------------|--------|
| 156 | (postresect* or post-resect*).mp,kw.                                                                    | 200    |
| 157 | (postintervention* or post-intervention*).mp,kw.                                                        | 3589   |
| 158 | (postlapar* or post-lapar*).mp,kw.                                                                      | 107    |
| 159 | (postmastectom* or post-mastectom*).mp,kw.                                                              | 361    |
| 160 | (follow* adj2 surg*).mp,kw.                                                                             | 8004   |
| 161 | (follow* adj2 intervention*).mp,kw.                                                                     | 1837   |
| 162 | (follow* adj2 procedur*).mp,kw.                                                                         | 1775   |
| 163 | (follow* adj2 resect*).mp,kw.                                                                           | 1800   |
| 164 | (after adj3 incision?).mp,kw.                                                                           | 389    |
| 165 | (after adj3 laparo*).mp,kw.                                                                             | 1870   |
| 166 | (after adj3 operati*).mp,kw.                                                                            | 5706   |
| 167 | (after adj3 procedur*).mp.                                                                              | 5427   |
| 168 | (after adj3 resect*).mp,kw.                                                                             | 4721   |
| 169 | (after adj3 surger*).mp,kw.                                                                             | 25085  |
| 170 | (after adj3 surgical*).mp,kw.                                                                           | 5026   |
| 171 | or/147-170 [ Postoperative & related terms ]                                                            | 100092 |
| 172 | 146 and 171 [ (OSA + (Sleep + Assessment)) + Postoperative ]                                            | 321    |
| 173 | Complication?.mp,kw.                                                                                    | 94475  |
| 174 | ae.fs. [Adverse Effects floating subheading]                                                            | 23     |
| 175 | ci.fs. [Chemically induced floating subheading]                                                         | 7      |
| 176 | co.fs. [Complications floating subheading]                                                              | 27     |
| 177 | ct.fs. [Contraindications floating subheading]                                                          | 0      |
| 178 | de.fs. [Drug Effects floating subheading]                                                               | 50     |
| 179 | pc.fs. [Prevention & Control floating subheading]                                                       | 105    |
| 180 | po.fs. [Poisoning floating subheading]                                                                  | 0      |
| 181 | to.fs. [Toxicity floating subheading]                                                                   | 7      |
| 182 | Dose-Response Relationship, Drug/                                                                       | 0      |
| 183 | exp "Drug-Related Side Effects And Adverse Reactions"/ [Nb: Drug Toxicity Was Changed To This Jan 2014] | 16     |
| 184 | exp Abnormalities, Drug Induced/                                                                        | 3      |
| 185 | exp Adverse Drug Reaction Reporting Systems/                                                            | 0      |
| 186 | exp Clinical Trial, Phase Iv/                                                                           | 0      |
| 187 | exp Drug Eruptions/                                                                                     | 0      |
| 188 | exp Drug Hypersensitivity/                                                                              | 1      |
| 189 | exp Drug Monitoring/                                                                                    | 2      |
| 190 | exp Poisoning/                                                                                          | 10     |
| 191 | exp Product Surveillance, Postmarketing/                                                                | 1      |
| 192 | exp Substance-Related Disorders/                                                                        | 51     |
| 193 | exp Toxic Actions/                                                                                      | 67     |
| 194 | Failure To Rescue, Health Care/ [New MeSH 2016]                                                         | 0      |
| 195 | Herb-Drug Interactions/                                                                                 | 0      |

|     |                                                                                                                                                                                                                                   |        |
|-----|-----------------------------------------------------------------------------------------------------------------------------------------------------------------------------------------------------------------------------------|--------|
| 196 | Iatrogenic Disease/                                                                                                                                                                                                               | 0      |
| 197 | Malpractice/                                                                                                                                                                                                                      | 1      |
| 198 | Medical Errors/                                                                                                                                                                                                                   | 0      |
| 199 | Medication Errors/                                                                                                                                                                                                                | 0      |
| 200 | Morbidity/                                                                                                                                                                                                                        | 0      |
| 201 | Mortality/                                                                                                                                                                                                                        | 0      |
| 202 | Patient Harm/ [New MeSH 2014]                                                                                                                                                                                                     | 0      |
| 203 | ((allergic or idiosyncratic*) adj2 react*).mp,kw.                                                                                                                                                                                 | 1417   |
| 204 | ((allergic or idiosyncratic*) adj2 respons*).mp,kw.                                                                                                                                                                               | 486    |
| 205 | ((drug? or medication?) adj2 (hypersensitiv* or hypersensitiv*)).mp,kw.                                                                                                                                                           | 305    |
| 206 | ((incorrect* or incomplete) adj2 knowledge).mp,kw.                                                                                                                                                                                | 164    |
| 207 | ((phase iv or phase four) adj2 trial?).mp,kw.                                                                                                                                                                                     | 55     |
| 208 | ((undesirable or harm* or serious* or toxic) adj3 (effect* or reaction* or event* or outcome*)).mp,kw.                                                                                                                            | 12380  |
| 209 | (adverse* adj2 affect*).mp,kw.                                                                                                                                                                                                    | 3341   |
| 210 | (adverse* adj2 drug*).mp,kw.                                                                                                                                                                                                      | 3488   |
| 211 | (adverse* adj2 effect*).mp,kw.                                                                                                                                                                                                    | 18599  |
| 212 | (adverse* adj2 event*).mp,kw.                                                                                                                                                                                                     | 21787  |
| 213 | (adverse* adj2 outcome*).mp,kw.                                                                                                                                                                                                   | 6107   |
| 214 | (adverse* adj2 react*).mp,kw.                                                                                                                                                                                                     | 5106   |
| 215 | (inaccura* adj2 (information or record*)).mp,kw.                                                                                                                                                                                  | 104    |
| 216 | (incomplete adj2 (information or record*)).mp,kw.                                                                                                                                                                                 | 296    |
| 217 | (near adj2 miss*).mp,kw.                                                                                                                                                                                                          | 295    |
| 218 | (omission? adj2 (dose? or drug? or medication?)).mp,kw.                                                                                                                                                                           | 46     |
| 219 | (omit* adj2 (dose? or drug? or medication?)).mp,kw.                                                                                                                                                                               | 34     |
| 220 | (patient? adj1 report* adj1 incident?).mp,kw.                                                                                                                                                                                     | 1      |
| 221 | (prevent* adj2 accident*).mp,kw.                                                                                                                                                                                                  | 290    |
| 222 | (prevent* adj2 inciden*).mp,kw.                                                                                                                                                                                                   | 242    |
| 223 | (safe or safety or side effect* or undesirable effect* or treatment emergent or tolerability or toxicity or adrs or (adverse adj2 (effect or effects or reaction or reactions or event or events or outcome or outcomes))).ti,ab. | 166296 |
| 224 | (undesir* adj2 event?).mp,kw.                                                                                                                                                                                                     | 59     |
| 225 | adr.mp,kw. [adverse drug reaction]                                                                                                                                                                                                | 979    |
| 226 | adrs.mp,kw. [adverse drug reactions]                                                                                                                                                                                              | 694    |
| 227 | adverse drug?.mp,kw.                                                                                                                                                                                                              | 2900   |
| 228 | contraindicat*.mp,kw.                                                                                                                                                                                                             | 4209   |
| 229 | dae.mp,kw. [drug related adverse event]                                                                                                                                                                                           | 124    |
| 230 | daes.mp,kw. [drug related adverse events]                                                                                                                                                                                         | 21     |
| 231 | dose-response relation*.mp,kw.                                                                                                                                                                                                    | 1196   |
| 232 | drug erupt*.mp,kw.                                                                                                                                                                                                                | 295    |

|     |                                                                                   |        |
|-----|-----------------------------------------------------------------------------------|--------|
| 233 | drug induced.mp,kw.                                                               | 3335   |
| 234 | drug toxic*.mp,kw.                                                                | 663    |
| 235 | drug-related.mp,kw.                                                               | 1787   |
| 236 | error?.mp,kw.                                                                     | 49410  |
| 237 | harm*5.mp,kw.                                                                     | 29031  |
| 238 | iatrogenic*.mp,kw.                                                                | 3447   |
| 239 | intolerab*.mp,kw.                                                                 | 486    |
| 240 | malfunction*.mp,kw.                                                               | 1419   |
| 241 | mistak*.mp,kw.                                                                    | 2739   |
| 242 | noxious.mp,kw.                                                                    | 1101   |
| 243 | pharmacovigilan*.mp,kw.                                                           | 833    |
| 244 | pharmaco-vigilan*.mp,kw.                                                          | 7      |
| 245 | poison*.mp,kw.                                                                    | 6631   |
| 246 | sequelae.mp,kw.                                                                   | 4907   |
| 247 | side effect*.mp,kw.                                                               | 24084  |
| 248 | tolerability.mp,kw.                                                               | 5700   |
| 249 | unanticipat*.mp,kw.                                                               | 908    |
| 250 | undesired.mp,kw.                                                                  | 1436   |
| 251 | unintended.mp,kw.                                                                 | 1591   |
| 252 | risk*3.mp.                                                                        | 232883 |
| 253 | or/173-252 [~~ Adverse Effects / Adverse Drug Events -- BROADER<br>~~]            | 513792 |
| 254 | 172 and 253 [ (OSA + (Sleep + Assessment)) + Postoperative +<br>Adverse Effects ] | 184    |
| 255 | limit 254 to english language                                                     | 180    |
| 256 | remove duplicates from 255                                                        | 179    |



**e-Table 3.**

**2018-01-05 FC CS -OSA and Sleep Assessment and Postoperative and Adverse Effects – Embase**

| #  | Searches                                            | Results |
|----|-----------------------------------------------------|---------|
| 1  | exp sleep disordered breathing/                     | 36017   |
| 2  | exp obesity hypoventilation syndrome/               | 1647    |
| 3  | exp Cheyne Stokes Respiration/                      | 1559    |
| 4  | (apn?ea adj1 attack*).mp,kw.                        | 117     |
| 5  | (apn?ea adj1 index*).mp,kw.                         | 1665    |
| 6  | (apn?ea adj1 indices*).mp,kw.                       | 106     |
| 7  | (apn?ea adj1 monitor*).mp,kw.                       | 2733    |
| 8  | (central adj2 apnea*).mp,kw.                        | 4042    |
| 9  | (central adj2 apnoea*).mp,kw.                       | 686     |
| 10 | (cheyne-stokes adj1 breath*).mp,kw.                 | 1613    |
| 11 | (cheyne-stokes adj1 respirat*).mp,kw.               | 980     |
| 12 | (haddad* adj1 syndrom*).mp,kw.                      | 39      |
| 13 | (high* altitud* adj2 (period* adj2 breath*)).mp,kw. | 20      |
| 14 | (hypersomni* adj2 periodic breath*).mp,kw.          | 23      |
| 15 | (hypersomni* adj2 periodic respirat*).mp,kw.        | 14      |
| 16 | (mixed adj2 apnea*).mp,kw.                          | 310     |
| 17 | (mixed adj2 apnoea*).mp,kw.                         | 72      |
| 18 | (nocturnal adj2 hypoventilation).mp,kw.             | 400     |
| 19 | (nocturnal adj2 hypoxemia).mp,kw.                   | 686     |
| 20 | (obes* hypoventil* adj2 apne*?).mp,kw.              | 66      |
| 21 | (obes* hypoventil* adj2 apnoe*?).mp,kw.             | 18      |
| 22 | (obstruct* adj2 hypoapnea*).mp,kw.                  | 2       |
| 23 | (obstruct* adj2 hypo-apnea*).mp,kw.                 | 0       |
| 24 | (obstruct* adj2 hypoapnoea*).mp,kw.                 | 0       |
| 25 | (obstruct* adj2 hypo-apnoea*).mp,kw.                | 0       |
| 26 | (obstruct* adj2 hypopnea*).mp,kw.                   | 642     |
| 27 | (obstruct* adj2 hypopnoea*).mp,kw.                  | 146     |
| 28 | (ondine* adj2 curse*).mp,kw.                        | 326     |
| 29 | (ondine* adj2 syndrome*).mp,kw.                     | 171     |
| 30 | (pickwick* adj1 syndrom*).mp,kw.                    | 499     |
| 31 | (primary adj2 alveolar adj2 hypoventil*).mp,kw.     | 108     |
| 32 | (primary adj2 alveolar hypoventil*).mp,kw.          | 111     |
| 33 | (sleep adj2 respirat* adj1 disorder*).mp,kw.        | 441     |
| 34 | (sleep disorder* adj1 breathing).mp,kw.             | 36415   |
| 35 | (sleep disorder* adj1 respirat*).mp,kw.             | 158     |
| 36 | (sleep* adj2 hypopn?ea*).mp,kw.                     | 3022    |
| 37 | (upper airway resistanc* adj2 syndrom*).mp,kw.      | 517     |

|    |                                                                                                                                                                                                                                                                                                                                                                                                            |        |
|----|------------------------------------------------------------------------------------------------------------------------------------------------------------------------------------------------------------------------------------------------------------------------------------------------------------------------------------------------------------------------------------------------------------|--------|
| 38 | apnea-hypopnea*.mp,kw.                                                                                                                                                                                                                                                                                                                                                                                     | 15832  |
| 39 | apneic*.mp,kw.                                                                                                                                                                                                                                                                                                                                                                                             | 3610   |
| 40 | apnoea-hypopnoea*.mp,kw.                                                                                                                                                                                                                                                                                                                                                                                   | 1978   |
| 41 | apnoeic*.mp,kw.                                                                                                                                                                                                                                                                                                                                                                                            | 1204   |
| 42 | cahs.tw. [central alveolar hypoventilation syndrome]                                                                                                                                                                                                                                                                                                                                                       | 233    |
| 43 | ccah.tw. [congenital central alveolar hypoventilation ]                                                                                                                                                                                                                                                                                                                                                    | 14     |
| 44 | ccahs.tw. [congenital central alveolar hypoventilation syndrome]                                                                                                                                                                                                                                                                                                                                           | 5      |
| 45 | central alveolar hypoventilation syndrome*.mp,kw.                                                                                                                                                                                                                                                                                                                                                          | 59     |
| 46 | csas.tw. [Central Sleep Apnea Syndrome]                                                                                                                                                                                                                                                                                                                                                                    | 881    |
| 47 | hypopneic*.mp,kw.                                                                                                                                                                                                                                                                                                                                                                                          | 110    |
| 48 | hypopnoeic*.mp,kw.                                                                                                                                                                                                                                                                                                                                                                                         | 29     |
| 49 | obes* hypoventil* syndrome?.mp,kw.                                                                                                                                                                                                                                                                                                                                                                         | 1823   |
| 50 | osa.tw,kw.                                                                                                                                                                                                                                                                                                                                                                                                 | 20986  |
| 51 | osahs.tw,kw.                                                                                                                                                                                                                                                                                                                                                                                               | 1738   |
| 52 | osas.tw,kw.                                                                                                                                                                                                                                                                                                                                                                                                | 6291   |
| 53 | sleep apne*.mp,kw.                                                                                                                                                                                                                                                                                                                                                                                         | 55765  |
| 54 | sleep apnoe*.mp,kw.                                                                                                                                                                                                                                                                                                                                                                                        | 9051   |
| 55 | upper airway* resistan* syndrom*.mp,kw.                                                                                                                                                                                                                                                                                                                                                                    | 538    |
| 56 | or/1-55 [ ~~ Obstructive Sleep Apnea & Related terms ~~ ]                                                                                                                                                                                                                                                                                                                                                  | 80051  |
| 57 | exp sleep/ or dreams/ or sleep deprivation/ or sleep stages/ or sleep, rem/                                                                                                                                                                                                                                                                                                                                | 221872 |
| 58 | exp sleep wake disorders/ or dyssomnias/ or exp parasomnias/                                                                                                                                                                                                                                                                                                                                               | 200977 |
| 59 | sleep*.mp,kw.                                                                                                                                                                                                                                                                                                                                                                                              | 284658 |
| 60 | slept.mp,kw.                                                                                                                                                                                                                                                                                                                                                                                               | 4238   |
| 61 | dyssomni*.mp,kw.                                                                                                                                                                                                                                                                                                                                                                                           | 215    |
| 62 | insomni*.mp,kw.                                                                                                                                                                                                                                                                                                                                                                                            | 65284  |
| 63 | parasomni*.mp,kw.                                                                                                                                                                                                                                                                                                                                                                                          | 5779   |
| 64 | somnambul*.mp,kw.                                                                                                                                                                                                                                                                                                                                                                                          | 531    |
| 65 | somnolen*.mp,kw.                                                                                                                                                                                                                                                                                                                                                                                           | 50226  |
| 66 | sopor.mp,kw.                                                                                                                                                                                                                                                                                                                                                                                               | 147    |
| 67 | wakeful*.mp,kw.                                                                                                                                                                                                                                                                                                                                                                                            | 35165  |
| 68 | sleep/ or daytime somnolence/ or night sleep/ or nonrem sleep/ or rem sleep/ or sleep arousal disorder/ or sleep deprivation/ or sleep disorder/ or sleep hygiene/ or sleep induction/ or sleep medicine/ or sleep parameters/ or sleep pattern/ or sleep quality/ or sleep stage/ or sleep time/ or sleep waking cycle/ or sleep walking/ or sleep/ or slow wave sleep/ or somnolence/ or sopor/ [Embase] | 224496 |
| 69 | or/57-68 [ Sleep & related terms ]                                                                                                                                                                                                                                                                                                                                                                         | 387878 |
| 70 | Data Collection/                                                                                                                                                                                                                                                                                                                                                                                           | 198151 |
| 71 | Focus Groups/                                                                                                                                                                                                                                                                                                                                                                                              | 179429 |
| 72 | Health Care Surveys/                                                                                                                                                                                                                                                                                                                                                                                       | 8434   |
| 73 | Health Impact Assessment/                                                                                                                                                                                                                                                                                                                                                                                  | 3438   |
| 74 | Health Status Indicators/                                                                                                                                                                                                                                                                                                                                                                                  | 1523   |

|     |                                                |         |
|-----|------------------------------------------------|---------|
| 75  | Health Surveys/                                | 166168  |
| 76  | Interviews As Topic/                           | 121382  |
| 77  | Narration/                                     | 12962   |
| 78  | Pain Measurement/                              | 4628    |
| 79  | "Surveys and Questionnaires"/                  | 568562  |
| 80  | assess*.mp,kw.                                 | 4282756 |
| 81  | audit?.mp,kw.                                  | 75863   |
| 82  | bank?.mp,kw.                                   | 57197   |
| 83  | checklist?.mp,kw.                              | 46835   |
| 84  | check-list?.mp,kw.                             | 4388    |
| 85  | evaluat*.mp,kw.                                | 4362396 |
| 86  | focus_group*.mp,kw.                            | 43526   |
| 87  | (form or forms).mp,kw.                         | 1565492 |
| 88  | (health adj2 determinant*).mp.                 | 9810    |
| 89  | index*.mp,kw.                                  | 1041924 |
| 90  | indices.mp,kw.                                 | 177019  |
| 91  | indicator?.mp.                                 | 335957  |
| 92  | interview*.mp,kw.                              | 414761  |
| 93  | instrument?.mp,kw.                             | 269438  |
| 94  | inventories.mp,kw.                             | 20943   |
| 95  | inventory.mp,kw.                               | 111515  |
| 96  | (measure or measures or measurement?).mp,kw.   | 2551732 |
| 97  | metric?.mp,kw.                                 | 57992   |
| 98  | narrati*.mp,kw.                                | 33434   |
| 99  | nomogram*.mp,kw.                               | 11404   |
| 100 | poll?.mp,kw.                                   | 3725    |
| 101 | PSQI.mp,kw.                                    | 4793    |
| 102 | QLQ.mp,kw.                                     | 7535    |
| 103 | QoL.mp,kw.                                     | 56563   |
| 104 | questionnaire?.mp,kw.                          | 783170  |
| 105 | rating?.mp,kw.                                 | 284183  |
| 106 | (scale or scales).mp,kw.                       | 1006938 |
| 107 | screening?.mp,kw.                              | 915978  |
| 108 | (score or scores or scored or scoring?).mp,kw. | 1268941 |
| 109 | status_exam*.mp,kw.                            | 3146    |
| 110 | subscale?.mp,kw.                               | 50485   |
| 111 | sub-scale?.mp,kw.                              | 2995    |
| 112 | survey*.mp,kw.                                 | 1352157 |
| 113 | (tool? or toolkit? or tool-kit?).mp,kw.        | 789422  |
| 114 | questionnaire/ [Embase]                        | 568562  |
| 115 | health care survey/                            | 13407   |

|     |                                                                                                                                                                                                                                                                                 |          |
|-----|---------------------------------------------------------------------------------------------------------------------------------------------------------------------------------------------------------------------------------------------------------------------------------|----------|
| 116 | health status indicator/ or disease activity score/                                                                                                                                                                                                                             | 5989     |
| 117 | exp interview/ or delphi study/ or semi structured interview/ or structured interview/ or exp telephone interview/ or unstructured interview/                                                                                                                                   | 226228   |
| 118 | "ferrans and powers quality of life index"/ or "gastrointestinal quality of life index"/ or "international classification of functioning, disability and health"/ or quality adjusted life year/ or "quality of life index"/ or short form 36/ or "quality of life assessment"/ | 51867    |
| 119 | "SPO2".mp.                                                                                                                                                                                                                                                                      | 8824     |
| 120 | "SP-O2".mp.                                                                                                                                                                                                                                                                     | 168      |
| 121 | ODI.mp.                                                                                                                                                                                                                                                                         | 6181     |
| 122 | ((oxygen* or O2) adj1 desatur* adj1 (index?? or indices)).mp.                                                                                                                                                                                                                   | 1628     |
| 123 | (apn?ea adj2 duration*).mp.                                                                                                                                                                                                                                                     | 765      |
| 124 | ("CT90" or "CT 90").mp.                                                                                                                                                                                                                                                         | 195      |
| 125 | (oxygen* adj2 saturat*).mp.                                                                                                                                                                                                                                                     | 62914    |
| 126 | or/70-125 [ Assessment / Measures ]                                                                                                                                                                                                                                             | 13066355 |
| 127 | 69 and 126 [ Sleep + Assessment ]                                                                                                                                                                                                                                               | 232502   |
| 128 | exp Pain, Postoperative/                                                                                                                                                                                                                                                        | 56791    |
| 129 | exp Postoperative Care/                                                                                                                                                                                                                                                         | 84158    |
| 130 | exp Postoperative Period/                                                                                                                                                                                                                                                       | 457604   |
| 131 | exp Postoperative Complications/                                                                                                                                                                                                                                                | 619718   |
| 132 | (postop* or post-op*).mp,kw.                                                                                                                                                                                                                                                    | 1062132  |
| 133 | (postamput* or post-amput*).mp,kw.                                                                                                                                                                                                                                              | 785      |
| 134 | (postincision* or post-incision*).mp,kw.                                                                                                                                                                                                                                        | 381      |
| 135 | (postprocedur* or post-procedur*).mp,kw.                                                                                                                                                                                                                                        | 23457    |
| 136 | (postsurg* or post-surg*).mp,kw.                                                                                                                                                                                                                                                | 47012    |
| 137 | (postresect* or post-resect*).mp,kw.                                                                                                                                                                                                                                            | 2672     |
| 138 | (postintervention* or post-intervention*).mp,kw.                                                                                                                                                                                                                                | 25146    |
| 139 | (postlapar* or post-lapar*).mp,kw.                                                                                                                                                                                                                                              | 790      |
| 140 | (postmastectom* or post-mastectom*).mp,kw.                                                                                                                                                                                                                                      | 3964     |
| 141 | (follow* adj2 surg*).mp,kw.                                                                                                                                                                                                                                                     | 88108    |
| 142 | (follow* adj2 intervention*).mp,kw.                                                                                                                                                                                                                                             | 16115    |
| 143 | (follow* adj2 procedur*).mp,kw.                                                                                                                                                                                                                                                 | 24638    |
| 144 | (follow* adj2 resect*).mp,kw.                                                                                                                                                                                                                                                   | 20347    |
| 145 | (after adj3 incision?).mp,kw.                                                                                                                                                                                                                                                   | 5395     |
| 146 | (after adj3 laparo*).mp,kw.                                                                                                                                                                                                                                                     | 23463    |
| 147 | (after adj3 operati*).mp,kw.                                                                                                                                                                                                                                                    | 132120   |
| 148 | (after adj3 procedur*).mp.                                                                                                                                                                                                                                                      | 73995    |
| 149 | (after adj3 resect*).mp,kw.                                                                                                                                                                                                                                                     | 67953    |
| 150 | (after adj3 surger*).mp,kw.                                                                                                                                                                                                                                                     | 298062   |
| 151 | (after adj3 surgical*).mp,kw.                                                                                                                                                                                                                                                   | 65207    |
| 152 | or/128-151 [ Postoperative & related terms ]                                                                                                                                                                                                                                    | 1855439  |

|     |                                                                                                        |         |
|-----|--------------------------------------------------------------------------------------------------------|---------|
| 153 | 56 and 127 and 152 [ (OSA + (Sleep + Assessment)) + Postoperative ]                                    | 5829    |
| 154 | anesthesia complication/                                                                               | 9750    |
| 155 | ae.fs. [Adverse Drug Reaction floating subheading]                                                     | 1234331 |
| 156 | co.fs. [Complications floating subheading]                                                             | 1748039 |
| 157 | pc.fs. [Prevention floating subheading]                                                                | 1097223 |
| 158 | si.fs. [Side Effect floating subheading]                                                               | 826827  |
| 159 | to.fs. [Drug Toxicity floating subheading]                                                             | 522598  |
| 160 | exp dose response/                                                                                     | 397726  |
| 161 | exp adverse drug reaction/                                                                             | 479824  |
| 162 | exp drug induced disease/                                                                              | 38913   |
| 163 | exp drug surveillance program/                                                                         | 24345   |
| 164 | phase 4 clinical trial/                                                                                | 2871    |
| 165 | exp drug eruption/                                                                                     | 29201   |
| 166 | exp Drug Hypersensitivity/                                                                             | 58896   |
| 167 | exp Drug Monitoring/                                                                                   | 48838   |
| 168 | exp drug intoxication/                                                                                 | 20915   |
| 169 | drug overdose/                                                                                         | 21600   |
| 170 | exp drug toxicity/                                                                                     | 104870  |
| 171 | exp drug surveillance program/                                                                         | 24345   |
| 172 | postmarketing surveillance/                                                                            | 8917    |
| 173 | exp toxicity/                                                                                          | 641094  |
| 174 | herb-drug interaction/                                                                                 | 1398    |
| 175 | Iatrogenic Disease/                                                                                    | 25842   |
| 176 | Malpractice/                                                                                           | 32642   |
| 177 | medical error/                                                                                         | 17087   |
| 178 | medication error/                                                                                      | 16475   |
| 179 | Morbidity/                                                                                             | 310472  |
| 180 | Mortality/                                                                                             | 727072  |
| 181 | Patient Harm/                                                                                          | 1095    |
| 182 | ((allergic or idiosyncratic*) adj2 react*).mp,kw.                                                      | 48595   |
| 183 | ((allergic or idiosyncratic*) adj2 respons*).mp,kw.                                                    | 8705    |
| 184 | ((drug? or medication?) adj2 (hypersensitiv* or hypersensitiv*)).mp,kw.                                | 54219   |
| 185 | ((incorrect* or incomplete) adj2 knowledge).mp,kw.                                                     | 1185    |
| 186 | ((phase iv or phase four) adj2 trial?).mp,kw.                                                          | 617     |
| 187 | ((undesirable or harm* or serious* or toxic) adj3 (effect* or reaction* or event* or outcome*)).mp,kw. | 167578  |
| 188 | (adverse* adj2 affect*).mp,kw.                                                                         | 40268   |
| 189 | (adverse* adj2 drug*).mp,kw.                                                                           | 1444111 |
| 190 | (adverse* adj2 effect*).mp,kw.                                                                         | 272910  |
| 191 | (adverse* adj2 event*).mp,kw.                                                                          | 245706  |
| 192 | (adverse* adj2 outcome*).mp,kw.                                                                        | 83965   |

|     |                                                                                                                                                                                                                                   |         |
|-----|-----------------------------------------------------------------------------------------------------------------------------------------------------------------------------------------------------------------------------------|---------|
| 193 | (adverse* adj2 react*).mp,kw.                                                                                                                                                                                                     | 1455982 |
| 194 | (inaccura* adj2 (information or record*)).mp,kw.                                                                                                                                                                                  | 735     |
| 195 | (incomplete adj2 (information or record*)).mp,kw.                                                                                                                                                                                 | 3166    |
| 196 | (near adj2 miss*).mp,kw.                                                                                                                                                                                                          | 3026    |
| 197 | (omission? adj2 (dose? or drug? or medication?)).mp,kw.                                                                                                                                                                           | 657     |
| 198 | (omit* adj2 (dose? or drug? or medication?)).mp,kw.                                                                                                                                                                               | 462     |
| 199 | (patient? adj1 report* adj1 incident?).mp,kw.                                                                                                                                                                                     | 33      |
| 200 | (prevent* adj2 accident*).mp,kw.                                                                                                                                                                                                  | 18590   |
| 201 | (prevent* adj2 inciden*).mp,kw.                                                                                                                                                                                                   | 2343    |
| 202 | (safe or safety or side effect* or undesirable effect* or treatment emergent or tolerability or toxicity or adrs or (adverse adj2 (effect or effects or reaction or reactions or event or events or outcome or outcomes))).ti,ab. | 1967148 |
| 203 | (undesir* adj2 event?).mp,kw.                                                                                                                                                                                                     | 677     |
| 204 | adr.mp,kw. [adverse drug reaction]                                                                                                                                                                                                | 12530   |
| 205 | adrs.mp,kw. [adverse drug reactions]                                                                                                                                                                                              | 6599    |
| 206 | adverse drug?.mp,kw.                                                                                                                                                                                                              | 1441345 |
| 207 | complication?.mp,kw.                                                                                                                                                                                                              | 2796787 |
| 208 | contraindicat*.mp,kw.                                                                                                                                                                                                             | 105062  |
| 209 | dae.mp,kw. [drug related adverse event]                                                                                                                                                                                           | 815     |
| 210 | daes.mp,kw. [drug related adverse events]                                                                                                                                                                                         | 75      |
| 211 | dose-response relation*.mp,kw.                                                                                                                                                                                                    | 22055   |
| 212 | drug erupt*.mp,kw.                                                                                                                                                                                                                | 27950   |
| 213 | drug induced.mp,kw.                                                                                                                                                                                                               | 103431  |
| 214 | drug toxic*.mp,kw.                                                                                                                                                                                                                | 584155  |
| 215 | drug-related.mp,kw.                                                                                                                                                                                                               | 23200   |
| 216 | error?.mp,kw.                                                                                                                                                                                                                     | 570202  |
| 217 | harm*5.mp,kw.                                                                                                                                                                                                                     | 173135  |
| 218 | iatrogenic*.mp,kw.                                                                                                                                                                                                                | 53763   |
| 219 | intolerab*.mp,kw.                                                                                                                                                                                                                 | 6209    |
| 220 | malfunction*.mp,kw.                                                                                                                                                                                                               | 19234   |
| 221 | mistak*.mp,kw.                                                                                                                                                                                                                    | 30422   |
| 222 | noxious.mp,kw.                                                                                                                                                                                                                    | 20148   |
| 223 | pharmacovigilan*.mp,kw.                                                                                                                                                                                                           | 9061    |
| 224 | pharmaco-vigilan*.mp,kw.                                                                                                                                                                                                          | 106     |
| 225 | poison*.mp,kw.                                                                                                                                                                                                                    | 136109  |
| 226 | sequelae.mp,kw.                                                                                                                                                                                                                   | 80167   |
| 227 | side effect*.mp,kw.                                                                                                                                                                                                               | 1112086 |
| 228 | tolerability.mp,kw.                                                                                                                                                                                                               | 163202  |
| 229 | unanticipat*.mp,kw.                                                                                                                                                                                                               | 7726    |
| 230 | undesired.mp,kw.                                                                                                                                                                                                                  | 8700    |
| 231 | unintended.mp,kw.                                                                                                                                                                                                                 | 13234   |

|     |                                                                                                                                                                                                   |         |
|-----|---------------------------------------------------------------------------------------------------------------------------------------------------------------------------------------------------|---------|
| 232 | or/154-231 [~~ Adverse Effects / Adverse Drug Events -- BROADER<br>~~]                                                                                                                            | 8143223 |
| 233 | 153 and 232 [ (OSA + (Sleep + Assessment)) + Postoperative +<br>Adverse Effects ]                                                                                                                 | 3617    |
| 234 | limit 233 to english language                                                                                                                                                                     | 3374    |
| 235 | (exp animals/ or exp animal experimentation/ or nonhuman/) not ((exp<br>animals/ or exp animal experimentation/ or nonhuman/) and exp<br>human/)                                                  | 6757969 |
| 236 | 234 not 235                                                                                                                                                                                       | 3365    |
| 237 | limit 234 to human                                                                                                                                                                                | 3254    |
| 238 | 236 or 237                                                                                                                                                                                        | 3365    |
| 239 | remove duplicates from 238                                                                                                                                                                        | 3223    |
| 240 | limit 239 to conference abstract status                                                                                                                                                           | 860     |
| 241 | limit 239 to (books or "book review" or conference abstract or<br>"conference review")                                                                                                            | 860     |
| 242 | 240 or 241                                                                                                                                                                                        | 860     |
| 243 | 239 not 242                                                                                                                                                                                       | 2363    |
| 244 | limit 243 to (embryo <first trimester> or infant <to one year> or child<br><unspecified age> or preschool child <1 to 6 years> or school child <7<br>to 12 years> or adolescent <13 to 17 years>) | 576     |
| 245 | 243 not 244                                                                                                                                                                                       | 1787    |
| 246 | limit 243 to (adult <18 to 64 years> or aged <65+ years>)                                                                                                                                         | 1156    |
| 247 | 245 or 246                                                                                                                                                                                        | 1929    |
| 248 | limit 247 to yr="2008 -Current"                                                                                                                                                                   | 1422    |

**e-Table 4 – BMI for the included studies**

| Reference                            | BMI                                                                                                                                                                                                                                                                                                                                                                                         |
|--------------------------------------|---------------------------------------------------------------------------------------------------------------------------------------------------------------------------------------------------------------------------------------------------------------------------------------------------------------------------------------------------------------------------------------------|
|                                      | <b>Upper airway surgery</b>                                                                                                                                                                                                                                                                                                                                                                 |
| Asha'ari 2017 <sup>26</sup>          | BMI 34.5 vs 31.1 kg/m <sup>2</sup> ; Cx vs no Cx, P = 0.02<br>BMI per 5 units, OR 1.11, P = 0.03                                                                                                                                                                                                                                                                                            |
| Kandasamy 2013 <sup>24</sup>         | BMI 31.6 (9) vs 30.2 (6) kg/m <sup>2</sup> ; Cx vs no Cx, P = 0.26                                                                                                                                                                                                                                                                                                                          |
| Kezirian 2006 <sup>23</sup>          | BMI 35.4 +/- 7.1 vs 33.1 +/- 5.9 kg/m <sup>2</sup> , P = 0.04<br>Bivariate analysis BMI per 5 units, OR 1.34, P = 0.04; unadjusted OR; 1.29, P = 0.08, adjusted OR for AHI, CCI: 1.19, P = 0.38                                                                                                                                                                                             |
| Kim 2015 <sup>40</sup>               | BMI 28.8 +/- 3 vs 27.7 +/- 3 kg/m <sup>2</sup> , P = 0.226<br>Lowest SpO <sub>2</sub> in PACU vs BMI, r = -0.299, P = 0.004<br>Lowest SpO <sub>2</sub> during 1 <sup>st</sup> postoperative night vs BMI, r = -0.219, P = 0.05                                                                                                                                                              |
| Pang 2012 <sup>25</sup>              | n/a                                                                                                                                                                                                                                                                                                                                                                                         |
|                                      | <b>Cardiac surgery</b>                                                                                                                                                                                                                                                                                                                                                                      |
| Foldvary-Schaefer 2015 <sup>38</sup> | BMI in AHI < 15 vs AHI ≥ 15, ns (26.3 vs 26.8 kg/m <sup>2</sup> )<br>CT90 correlated with greater BMI, P = 0.007, correlation coefficient not reported                                                                                                                                                                                                                                      |
| Kaw 2017 <sup>31</sup>               | BMI between AHI < 15 vs AHI ≥ 15, ns<br>Effect modification with BMI > 32 kg/m <sup>2</sup><br>BMI (median) ≥ 32 kg/m <sup>2</sup> , a 15% increase in new onset atrial fibrillation per 5-unit increase in AHI.<br>BMI < 32 kg/m <sup>2</sup> , association between AHI and new onset atrial fibrillation, ns.<br>Similar findings observed with ODI and BMI (OR, 1.15; 95% CI, 1.04-1.28) |
| Kua 2016 <sup>33</sup>               | Acute kidney injury; BMI, adj OR 1.18, P < 0.01                                                                                                                                                                                                                                                                                                                                             |
| Roggenbach 2014 <sup>32</sup>        | BMI 27.2 vs 27.1 kg/m <sup>2</sup> , post-operative delirium vs no post-operative delirium, ns                                                                                                                                                                                                                                                                                              |
| Unosawa 2012 <sup>61</sup>           | BMI 25.5 vs 23.6 kg/m <sup>2</sup> in AHI ≥ 15 vs AHI < 15, ns<br>BMI not included in multivariate analysis                                                                                                                                                                                                                                                                                 |
|                                      | <b>Vascular surgery</b>                                                                                                                                                                                                                                                                                                                                                                     |
| Ultrainen 2014 <sup>34</sup>         | BMI 26 vs 25 kg/m <sup>2</sup> in AHI ≥ 20 vs AHI < 20, ns<br>BMI not included in multivariate analysis                                                                                                                                                                                                                                                                                     |
|                                      | <b>Bariatric surgery</b>                                                                                                                                                                                                                                                                                                                                                                    |
| Turan 2015 <sup>39</sup>             | Average BMI 46 kg/m <sup>2</sup><br>BMI not included in multivariate analysis                                                                                                                                                                                                                                                                                                               |
| Weingarten 2011 <sup>29</sup>        | BMI 46.3, 48.1, 50.7, 52.7 kg/m <sup>2</sup> in no OSA, mild, moderate, severe OSA group<br>BMI per 5 kg/m <sup>2</sup> , any Cx, OR 1.19, P < 0.001; OR 1.35 for pulmonary Cx, P < 0.001                                                                                                                                                                                                   |
|                                      | <b>Other surgical populations</b>                                                                                                                                                                                                                                                                                                                                                           |
| Chung 2014 <sup>21</sup>             | Average baseline BMI 31 kg/m <sup>2</sup> . BMI incorporated into statistical model                                                                                                                                                                                                                                                                                                         |
| Devaraj 2017 <sup>62</sup>           | BMI 27.2 vs 24.1 kg/m <sup>2</sup> ; OSA vs non-OSA, P < 0.001<br>BMI not included in multivariable logistic regression                                                                                                                                                                                                                                                                     |



|                               |                                                                                                                   |
|-------------------------------|-------------------------------------------------------------------------------------------------------------------|
| Hwang 2008 <sup>36</sup>      | BMI 36.5 vs 34.0 kg/m <sup>2</sup> ; ODI 4% ≥ 5 vs ODI 4% < 5, ns<br>BMI included in logistic regression analysis |
| Kaw 2016 <sup>51</sup>        | BMI 41.4 vs 38.1 kg/m <sup>2</sup> ; hypercapnic OSA vs OSA, P= 0.001                                             |
| Mador 2013 <sup>41</sup>      | BMI 34.6 vs 31.5 kg/m <sup>2</sup> ; OSA vs control, P < 0.01                                                     |
| Mason 2017 <sup>37</sup>      | BMI 30.1 vs 28.0 kg/m <sup>2</sup> ; OSA vs control, P = 0.01                                                     |
| Mutter 2014 <sup>30</sup>     | BMI not reported                                                                                                  |
| Subramani, 2017 <sup>12</sup> | BMI > 35 kg/m <sup>2</sup> associated with death/near death and critical events;<br>adj OR 2.7, P = 0.044         |

Cx: Complication; AHI: apnea hyponea index; CCI: charlson comorbidity index, ODI: oxygen desaturation index
